# Supplementary material
Source: PubMed Central journal article supplement (PMC4854668)
Supplement: NIHMS780568-supplement-Supplement.pdf [file NIHMS780568-supplement-Supplement.pdf]

## Supplemental Material

Title: **Descriptive Epidemiology and Short-Term Outcomes of Heart Failure Hospitalization in Rural Haiti**

**Authors:**

Gene F. Kwan, MD, MPH; Waking Jean-Baptiste, MD; Philip Cleophat, MD; Fèrnet Leandre, MD, MMSc-GHD; Martineau Louine, MD; Maxo Luma, MD, MPH; Emelia J. Benjamin, MD, ScM; Joia S. Mukherjee, MD, MPH; Gene Bukhman, MD, PhD;\* Lisa R. Hirschhorn, MD, MPH\*

### Supplement Contents:

|                           |         |                                                                                                       |
|---------------------------|---------|-------------------------------------------------------------------------------------------------------|
| <b>Supplement Methods</b> | Page 2  |                                                                                                       |
| <b>Supplement Results</b> | Page 5  |                                                                                                       |
| <b>Table S1</b>           | Page 7  | List of communes within the primary, secondary, and tertiary zones of University Hospital Mirebalais. |
| <b>Table S2</b>           | Page 8  | Heart failure diagnoses (from EMR) for study inclusion                                                |
| <b>Table S3</b>           | Page 9  | Demographics of patients with and without echocardiogram                                              |
| <b>Table S4</b>           | Page 10 | Echocardiographic measures by heart failure category                                                  |
| <b>Figure S1</b>          | Page 11 | Flow diagram                                                                                          |
| <b>References</b>         | Page 12 | Supplement references                                                                                 |

## Supplement Methods

### Hospital referral zones

Patients were grouped into proximity-based geographic zones based on self-reported addresses and UHM's regional referral structure (**Table S1**). Patients in zone 1 (primary catchment area) generally receive all primary care at UHM. Patients in zone 2 (secondary catchment area) generally receive primary care from another facility and UHM is the closest regional hospital. Patients in zone 3 may present to a regional hospital closer to them, but may be referred to UHM for specialty care. Zone 4 patients live outside the standard referral catchment area of UHM but self-present to UHM. Though the referral structure has been designed as part of hospital planning, the majority of patients self-present to a hospital of their choice.

### Electronic chart extraction

A list of patients meeting the inclusion criteria – along with demographic and care utilization data – were exported from the UHM electronic medical record (EMR). The electronic data export included basic demographics including age at the time of primary admission and address (to the level of the communal section). When a physician enters a brief consultation note in the EMR, the encounter is recorded with a date and time stamp. Physician-entered diagnoses are coded using the 10th revision of the International Statistical Classification of Diseases and Related Health Problems (ICD-10). Care utilization data including dates and times of admission, discharge, subsequent clinic visits, and repeat hospitalization dates were included in the data export. All variables involving dates, such as length-of-stay and number of days between hospital discharge and follow-up clinic visit, were calculated using the electronically entered dates.

## Paper chart extraction

The paper medical records were reviewed in November 2014. One co-investigator (GFK) extracted clinical information from the following sources (when available): admission note, progress notes, discharge summary, death certificate (if applicable), electrocardiogram, and laboratory results. Comorbidities such as history of hypertension and diabetes are based on patient self-report at the time of admission and were not systematically verified by clinician staff. Random glucose was not systematically recorded for the study. Patients generally do not know if they have had a prior myocardial infarction. When available, symptom severity indicated by the New York Heart Association classification[1] was extracted. Discharge medication lists were manually extracted from discharge summaries.

Study data were collected and managed using Research Electronic Data Capture (REDCap, Vanderbilt University, Nashville, TN) electronic data capture tools hosted at Boston University.[2] REDCap is a secure, web-based application designed to support data capture for research studies, providing an interface for validated data entry, procedures for importing data from external sources, and automated export procedures to common statistical packages. Validation rules, range checks, and consistency checks were used to ensure data entry quality. Data entered into the electronic database were not verified by another co-investigator.

## Clinical echocardiography data extraction

A cardiologist (GFK) performed clinical echocardiograms using SonoSite MicroMaxx (SonoSite, Inc., Bothell, WA) portable ultrasound machines. Standard two-dimensional echocardiographic measurements[3] and reports were entered into a clinical echocardiogram database housed in REDCap[2] at the time of the diagnostic procedure. Left ventricular mass was calculated using the cube formula.[3] Cardiologist echocardiograms were stored on the hospital's digital radiology system. When the visiting cardiologist was not at UHM, general and internal medicine

physicians performed basic echocardiograms to aid in the diagnosis of HF and inform clinical care.[4] However, the basic echocardiogram data were not electronically stored for review by a cardiologist and were not included in the present study.

### **Data merging**

Data from three sources were merged to produce the final combined study dataset: (1) exported data from the UHM EMR, (2) data extracted from paper charts, and (3) electronically coded echocardiogram data. The patient's hospital EMR identification number was used to link the 3 data sources. After the merged database was assembled, a unique study identification number was generated for all study participants and all identifiers were deleted. Only the study PI had access to the final dataset.

### **Patient follow-up at facilities other than UHM**

We linked clinic visit data from a nearby health center – in Lascahobas commune – to explore if patients presented to another local ZL-supported clinical site for follow-up after discharge.

### **Diagnostic characteristics of local physician HF diagnosis**

Local physicians assigned a diagnosis of HF based on clinical symptoms and signs. However, the cardiologist did not agree with the local physicians in all suspected cases. The diagnostic characteristic of local clinical diagnosis was assessed in relation to the diagnosis assigned by the cardiologist using echocardiography. Of the patients evaluated by the cardiologist, the positive predictive value was calculated by dividing the number of patients in whom the cardiologist agreed with the local physicians (true positives) by the total number of patients with suspected HF (true positives + false positives). As the cardiologist did not systematically assess patients who did not have a clinical diagnosis of HF assigned by the local physicians, other diagnostic characteristics such as sensitivity and specificity cannot be calculated.

## Supplement Results

### Self-reported hypertension and diabetes

During the course of routine clinical care, past medical history regarding hypertension and diabetes is recorded in the clinical chart. The available surrogate for hypertension was admission blood pressure. When comparing hypertension by past medical history against a diagnostic standard of hypertension by admission vital signs (systolic blood pressure  $\geq 140$  mmHg and diastolic blood pressure  $\geq 90$  mmHg), the sensitivity and specificity were 68% and 74%, respectively.

A past history of diabetes was only noted in 22 patients. The available surrogate for a diagnosis of diabetes was the prescription of glucose-lowering medications at discharge. When comparing diabetes by past medical history against a diagnostic standard of discharge diabetes medicine, the sensitivity and specificity were 79% and 96%, respectively. Because there were relatively few patients with a past history of diabetes, the positive predictive value was 50% (only half of patients with reported diabetes were treated with glucose-controlling medicines at discharge).

### Characteristics of patients with and without echocardiogram

The demographic and clinical characteristics of patients with (n=81, 26%) and without (n=230, n=74%) echocardiogram are shown in **Table S3**. The patients were similar with respect to age, sex, NYHA classification, and comorbidities. Compared to patients with echocardiogram, patients without echocardiogram had higher systolic (133 mmHg vs. 145 mmHg,  $p=.01$ ) and diastolic blood pressure (84 mmHg vs. 91 mmHg,  $p=.03$ ). The median length of stay was longer in patients with (12 days) vs. without (10 days) echocardiogram ( $p=.04$ ).

### Echocardiographic measures

Echocardiographic measures of the patients with formal echocardiograms are shown in **Table**

**S4.** Of patients with cardiomyopathy by echocardiography, mean left ventricle ejection fraction was very low at 22.1% ( $\pm$ standard deviation 7.6%) compared with 53.0% $\pm$ 16.9% for those with other causes of HF. Cardiomyopathy patients also had greater left ventricular end diastolic dimensions (54mm $\pm$ 13mm vs. 43mm $\pm$ 16mm],  $p < .01$ ) and mass (141g $\pm$ 59g vs. 85g $\pm$ 60g,  $p < .01$ ).

#### **Patient follow-up at facilities other than UHM**

Eighteen of the discharged HF patients lived in Lascahobas (zone 2) and served by the nearby ZL-supported health center. Seven of these 18 patients were linked to the UHM clinic within 30 days, with only one of the other 11 Lascahobas patients having a clinic visit at the Lascahobas health center after discharge from UHM, occurring 96 days later. No patients from any other neighboring communes were seen in the Lascahobas health center after UHM discharge.

**Supplement Table S1.** List of communes within the Primary, Secondary, and Tertiary zones of University Hospital Mirebalais. All other Communes in Haiti are considered outside of the referral zones. Population per 2012 estimates.[5]

| <b>Department</b>                                                    | <b>Commune</b>                 |
|----------------------------------------------------------------------|--------------------------------|
| <b>Zone 1: Primary catchment, population = 165,118</b>               |                                |
| Centre                                                               | Mirebalais                     |
| Centre                                                               | Saut d'Eau                     |
| Centre                                                               | Savanette                      |
| <b>Zone 2: Secondary catchment, population = 184,291</b>             |                                |
| Artibonite                                                           | La Chapelle                    |
| Centre                                                               | Boucan Carré                   |
| Centre                                                               | Lascahobas                     |
| Ouest                                                                | Cornillon                      |
| <b>Zone 3: Tertiary catchment, population = 2,189,873</b>            |                                |
| Artibonite                                                           | Desdunes                       |
| Artibonite                                                           | Dessalines                     |
| Artibonite                                                           | Gonaïves                       |
| Artibonite                                                           | Grande Saline                  |
| Artibonite                                                           | Petite Rivière de L'Artibonite |
| Artibonite                                                           | Saint-Marc                     |
| Artibonite                                                           | Saint-Michel de L'Attalaye     |
| Artibonite                                                           | Verrettes                      |
| Centre                                                               | Belladères                     |
| Centre                                                               | Cerca Cavajal                  |
| Centre                                                               | Cerca La Source                |
| Centre                                                               | Hinche                         |
| Centre                                                               | Thomassique                    |
| Centre                                                               | Thomonde                       |
| Ouest                                                                | Arcahaie                       |
| Ouest                                                                | Cabaret                        |
| Ouest                                                                | Croix-des-Bouquets             |
| Ouest                                                                | Fonds Verettes                 |
| Ouest                                                                | Thomazeau                      |
| <b>Zone 4: Outside the UHM referral zone, population = 7,873,929</b> |                                |

**Supplement Table S2.** Heart failure diagnoses for study inclusion  
(defined by clinical providers and entered in the EMR).

| <b>Heart Failure Diagnoses</b>                     | <b>ICD-10 code</b> |
|----------------------------------------------------|--------------------|
| Cardiomyopathy due to human immunodeficiency virus | B33.2              |
| Rheumatic mitral stenosis                          | I05.0              |
| Rheumatic heart disease, not mitral stenosis       | I09.1              |
| Rheumatic heart disease, unknown type              | I09.9              |
| Hypertensive heart disease with HF                 | I11.0              |
| Ischemic cardiomyopathy                            | I25.5              |
| Isolated right HF                                  | I27.9              |
| Dilated cardiomyopathy                             | I42.0              |
| Endomyocardial fibrosis                            | I42.3              |
| Alcoholic cardiomyopathy                           | I42.6              |
| Idiopathic cardiomyopathy                          | I42.8              |
| Congestive HF exacerbation                         | I50.9              |
| HF, not otherwise specified                        | I50.9              |
| Peripartum cardiomyopathy                          | O90.3              |
| Ventricular septal defect                          | Q21.0              |
| Atrial septal defect                               | Q21.1              |
| Tetralogy of Fallot                                | Q21.3              |
| Congenital heart disease                           | Q24.9              |



**Table S3. Demographic and clinical presentation characteristics for patients with and without echocardiogram\***

| Characteristic                         | n with available data <sup>†</sup> | Echo   |           | No Echo |           | p <sup>‡</sup> |
|----------------------------------------|------------------------------------|--------|-----------|---------|-----------|----------------|
| N (%)                                  | 311                                | 81     | (26.0)    | 230     | (74.0)    |                |
| Age at admission, years                | 311                                |        |           |         |           |                |
| Mean ±sd                               |                                    | 49.9   | ±17.7     | 53.4    | ±18.7     | .15            |
| ≤ 40 years, n (%)                      |                                    | 28     | (34.6)    | 63      | (27.4)    | .22            |
| Sex: Women, n (%)                      | 311                                | 50     | (61.7)    | 136     | (59.1)    | .68            |
| Catchment area, n (%)                  | 311                                |        |           |         |           | .03            |
| Zone 1 (Primary)                       |                                    | 32     | (39.5)    | 68      | (29.6)    |                |
| Zone 2 (Secondary)                     |                                    | 5      | (6.2)     | 44      | (19.1)    |                |
| Zone 3 (Tertiary)                      |                                    | 26     | (32.1)    | 73      | (31.7)    |                |
| Zone 4 (Outside referral zones)        |                                    | 18     | (22.2)    | 45      | (19.6)    |                |
| NYHA class n (%)                       | 156                                | (n=40) |           | (n=116) |           | .95            |
| Class II                               |                                    | 1      | (2.5)     | 2       | (1.7)     |                |
| Class III                              |                                    | 10     | (25.0)    | 29      | (25.0)    |                |
| Class IV                               |                                    | 29     | (72.5)    | 85      | (73.3)    |                |
| Comorbidities (self-reported)          |                                    |        |           |         |           |                |
| Hypertension, n (%)                    | 263                                | 29     | (43.9)    | 96      | (48.7)    | .50            |
| Diabetes, n (%)                        | 267                                | 2      | (3.0)     | 20      | (10.0)    | .08            |
| HIV, n (%)                             | 269                                | 0      | (0)       | 7       | (3.5)     | .12            |
| Habits                                 |                                    |        |           |         |           |                |
| Smoking, current or past, n (%)        | 267                                | 12     | (18.5)    | 57      | (28.2)    | .12            |
| Alcohol, current or past, n (%)        | 209                                | 6      | (11.5)    | 37      | (23.6)    | .06            |
| Vital Signs                            |                                    |        |           |         |           |                |
| Systolic BP, mmHg, mean ±sd            | 275                                | 133    | ±30       | 145     | ±37       | .01            |
| Diastolic BP, mmHg, mean ±sd           | 275                                | 84     | ±19       | 91      | ±25       | .03            |
| Heart rate, beats per minute, mean ±sd | 275                                | 111    | ±30       | 107     | ±25       | .31            |
| % Oxygen saturation, mean ±sd          | 273                                | 94     | ±9        | 94      | ±8        | .64            |
| ECG                                    |                                    |        |           |         |           |                |
| Atrial fibrillation, n (%)             | 232                                | 3      | (5.4)     | 11      | (6.3)     | .81            |
| Prior infarct (Q wave), n (%)          | 232                                | 3      | (5.4)     | 12      | (6.8)     | .70            |
| Laboratory                             |                                    |        |           |         |           |                |
| Sodium, mmol/L, mean ±sd               | 175                                | 139    | ±8        | 140     | ±7        | .25            |
| Potassium, mmol/L, mean ±sd            | 182                                | 4.8    | ±1.3      | 4.6     | ±1.0      | .22            |
| Blood urea nitrogen, median [Q1,Q3]    | 176                                | 14     | [11,32]   | 16      | [11,30]   | .62            |
| Creatinine, mg/dL, median [Q1,Q3]      | 211                                | 0.9    | [0.7,1.3] | 1.0     | [0.7,1.7] | .23            |
| Hemoglobin, g/dL, mean ±sd             | 269                                | 11.0   | ±2.5      | 10.4    | ±2.8      | .12            |
| Length of stay, days, median [Q1, Q3]  | 311                                | 12     | [8, 18]   | 10      | [7, 17]   | .04            |

Abbreviations: BP, blood pressure; HIV, human immunodeficiency virus; ECG, electrocardiogram; Q1, 25<sup>th</sup> percentile; Q3, 75<sup>th</sup> percentile.

\*Data shown are N (%), mean (± Standard Deviation), or median [Q1, Q3].

<sup>†</sup>Characteristics obtained through review of paper charts were either not available or incompletely obtained for some patients. Data are computed from non-missing values when indicated.

<sup>‡</sup>p values shown are from a comparison of women and men: t-test (comparison of means), Chi-square exact test (comparison of proportions), or Wilcoxon rank sum test (comparison of medians).

**Supplement Table S4.** Echocardiographic measures by HF category

| Measure                                         | Total<br>(n=81) | Cardiomyopathy<br>(n=52) | All other causes<br>(n=29) | <i>P</i> * |
|-------------------------------------------------|-----------------|--------------------------|----------------------------|------------|
| LV ejection fraction, %                         | 33.2 ± 18.9     | 22.1 ± 8                 | 53.0 ± 16.9                | <0.01      |
| Interventricular septum width, mm               | 8 ± 3           | 8 ± 2                    | 9 ± 4                      | 0.06       |
| LV end diastolic dimension, mm                  | 50 ± 15         | 54 ± 13                  | 43 ± 16                    | <0.01      |
| LV end systolic dimension, mm                   | 41 ± 16         | 48 ± 12                  | 28 ± 14                    | <0.01      |
| LV Posterior wall width, mm                     | 9 ± 3           | 8 ± 2                    | 9 ± 3                      | 0.10       |
| LV mass, grams                                  | 121 ± 65        | 141 ± 59                 | 85 ± 60                    | <0.01      |
| Aortic root dimension, mm                       | 27 ± 12         | 28 ± 12                  | 25 ± 12                    | 0.26       |
| Left atrial dimension, mm                       | 38 ± 13.9       | 40 ± 12                  | 35 ± 17                    | 0.15       |
| Pulmonary artery systolic pressure, mmHg (n=69) | 43 ± 12         | 39 ± 10                  | 49 ± 13                    | <0.01      |

Patients with cardiologist echocardiogram, n=81/311, 26.0%

Data shown are mean ± standard deviation.

\**P* values shown from t-test comparing cardiomyopathy and all other causes.

Abbreviation: LV, left ventricle.

**Supplement Figure legend**

**Supplement Figure 1:** Flow diagram showing the number of patients at each stage of the care cascade and the number with available echocardiography and discharge medication data.

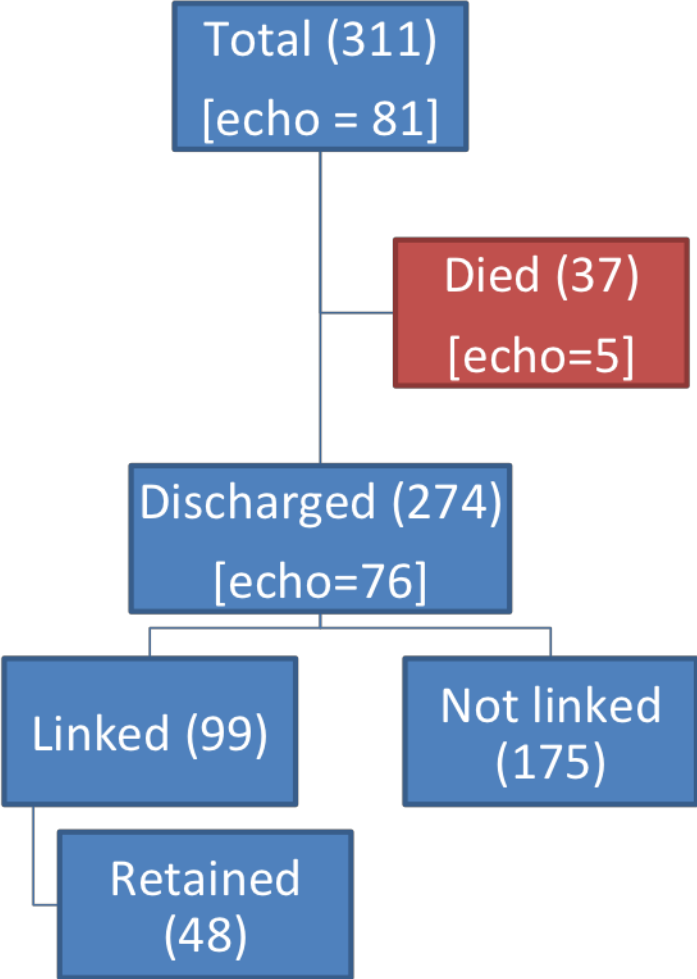

## References:

- 1 The Criteria Committee of the New York Heart Association. *Nomenclature and criteria for diagnosis of diseases of the heart and great vessels*. 9th ed. Boston: : Little & Brown 1994.
- 2 Harris PA, Taylor R, Thielke R, *et al*. Research electronic data capture (REDCap)--a metadata-driven methodology and workflow process for providing translational research informatics support. *J Biomed Inform* 2009;**42**:377–81. doi:10.1016/j.jbi.2008.08.010
- 3 Lang RM, Badano LP, Mor-Avi V, *et al*. Recommendations for Cardiac Chamber Quantification by Echocardiography in Adults: An Update from the American Society of Echocardiography and the European Association of Cardiovascular Imaging. *J Am Soc Echocardiogr* 2015;**28**:1–39.e14. doi:10.1016/j.echo.2014.10.003
- 4 Kwan GF, Bukhman AK, Miller AC, *et al*. A Simplified Echocardiographic Strategy for Heart Failure Diagnosis and Management Within an Integrated Noncommunicable Disease Clinic at District Hospital Level for Sub-Saharan Africa. *JACC Heart Fail* 2013;**1**:230–6. doi:10.1016/j.jchf.2013.03.006
- 5 Institut Haitien De Statistique et d'Informatique. Population Totale, Population de 18 Ans et Plus Menates et Densites Estimes en 2012. Port au Prince, Haiti: 2012.
